# Supplementary material for: Differential Regulation of Phytoene Synthase PSY1 During Fruit Carotenogenesis in Cultivated and Wild Tomato Species (Solanum section Lycopersicon)
Source: PubMed Central journal article supplement (PMC7569967; doi:10.3390/plants9091169), 2020-09-09
Supplement: plants-09-01169-s001.pdf [file plants-09-01169-s001.pdf]

Eppendorf BioSpectrometer basic

Device # : 6135HK604082

Software # : 4.3.6.0

2020/8/25

250\_800 2020-08-25 15:05:19

|                   |        |        | GF                                |                               | GF    |  |
|-------------------|--------|--------|-----------------------------------|-------------------------------|-------|--|
| Sample ID:        | Hexane | Hexane | <i>S. habrochaites</i><br>LA 2144 | <i>S. pennellii</i><br>LA0716 |       |  |
| Sample No:        | 001    | 002    | 003                               | 004                           |       |  |
| Dilution          |        |        | no                                | no                            |       |  |
| Fresh weight, mg  |        |        | 213,9                             | 257,2                         |       |  |
| Hexane volume, ml |        |        | 1                                 | 1                             |       |  |
| Wavelength (nm)   |        |        |                                   |                               |       |  |
| 250               | 0.000  | -0.005 | -0.003                            | 0.747                         | 0.990 |  |
| 251               | 0.000  | -0.005 | -0.003                            | 0.734                         | 0.980 |  |
| 252               | 0.000  | -0.005 | -0.002                            | 0.723                         | 0.970 |  |
| 253               | 0.000  | -0.005 | -0.002                            | 0.711                         | 0.962 |  |
| 254               | 0.000  | -0.005 | -0.002                            | 0.700                         | 0.955 |  |
| 255               | 0.000  | -0.005 | -0.002                            | 0.691                         | 0.949 |  |
| 256               | 0.000  | -0.006 | -0.002                            | 0.682                         | 0.944 |  |
| 257               | 0.000  | -0.005 | -0.002                            | 0.675                         | 0.939 |  |
| 258               | 0.000  | -0.004 | -0.001                            | 0.668                         | 0.936 |  |
| 259               | 0.000  | -0.003 | -0.001                            | 0.661                         | 0.932 |  |
| 260               | 0.000  | -0.004 | -0.002                            | 0.654                         | 0.929 |  |
| 261               | 0.000  | -0.005 | -0.002                            | 0.647                         | 0.926 |  |
| 262               | 0.000  | -0.005 | -0.003                            | 0.642                         | 0.923 |  |
| 263               | 0.000  | -0.006 | -0.003                            | 0.636                         | 0.920 |  |
| 264               | 0.000  | -0.006 | -0.003                            | 0.632                         | 0.918 |  |
| 265               | 0.000  | -0.006 | -0.002                            | 0.627                         | 0.915 |  |
| 266               | 0.000  | -0.006 | -0.002                            | 0.621                         | 0.912 |  |
| 267               | 0.000  | -0.006 | -0.002                            | 0.614                         | 0.905 |  |
| 268               | 0.000  | -0.006 | -0.002                            | 0.607                         | 0.897 |  |
| 269               | 0.000  | -0.006 | -0.002                            | 0.599                         | 0.887 |  |
| 270               | 0.000  | -0.007 | -0.003                            | 0.593                         | 0.875 |  |
| 271               | 0.000  | -0.007 | -0.003                            | 0.587                         | 0.865 |  |
| 272               | 0.000  | -0.007 | -0.003                            | 0.581                         | 0.854 |  |
| 273               | 0.000  | -0.008 | -0.003                            | 0.577                         | 0.844 |  |
| 274               | 0.000  | -0.008 | -0.003                            | 0.571                         | 0.833 |  |
| 275               | 0.000  | -0.009 | -0.003                            | 0.564                         | 0.821 |  |
| 276               | 0.000  | -0.009 | -0.003                            | 0.554                         | 0.806 |  |
| 277               | 0.000  | -0.008 | -0.003                            | 0.542                         | 0.790 |  |
| 278               | 0.000  | -0.009 | -0.003                            | 0.530                         | 0.776 |  |
| 279               | 0.000  | -0.009 | -0.003                            | 0.519                         | 0.763 |  |
| 280               | 0.000  | -0.010 | -0.003                            | 0.509                         | 0.752 |  |
| 281               | 0.000  | -0.009 | -0.003                            | 0.501                         | 0.742 |  |
| 282               | 0.000  | -0.009 | -0.003                            | 0.493                         | 0.733 |  |
| 283               | 0.000  | -0.009 | -0.003                            | 0.484                         | 0.722 |  |
| 284               | 0.000  | -0.009 | -0.004                            | 0.474                         | 0.710 |  |

|     |       |        |        |       |       |
|-----|-------|--------|--------|-------|-------|
| 285 | 0.000 | -0.009 | -0.004 | 0.462 | 0.696 |
| 286 | 0.000 | -0.009 | -0.004 | 0.450 | 0.682 |
| 287 | 0.000 | -0.009 | -0.003 | 0.437 | 0.668 |
| 288 | 0.000 | -0.008 | -0.003 | 0.426 | 0.658 |
| 289 | 0.000 | -0.008 | -0.003 | 0.415 | 0.648 |
| 290 | 0.000 | -0.008 | -0.003 | 0.405 | 0.639 |
| 291 | 0.000 | -0.008 | -0.003 | 0.395 | 0.629 |
| 292 | 0.000 | -0.008 | -0.003 | 0.386 | 0.618 |
| 293 | 0.000 | -0.008 | -0.003 | 0.378 | 0.605 |
| 294 | 0.000 | -0.008 | -0.003 | 0.370 | 0.592 |
| 295 | 0.000 | -0.009 | -0.003 | 0.363 | 0.580 |
| 296 | 0.000 | -0.009 | -0.003 | 0.357 | 0.569 |
| 297 | 0.000 | -0.009 | -0.003 | 0.351 | 0.560 |
| 298 | 0.000 | -0.009 | -0.003 | 0.345 | 0.552 |
| 299 | 0.000 | -0.009 | -0.003 | 0.340 | 0.545 |
| 300 | 0.000 | -0.009 | -0.003 | 0.336 | 0.539 |
| 301 | 0.000 | -0.009 | -0.003 | 0.332 | 0.535 |
| 302 | 0.000 | -0.009 | -0.003 | 0.328 | 0.530 |
| 303 | 0.000 | -0.009 | -0.003 | 0.324 | 0.526 |
| 304 | 0.000 | -0.008 | -0.003 | 0.320 | 0.521 |
| 305 | 0.000 | -0.008 | -0.003 | 0.316 | 0.517 |
| 306 | 0.000 | -0.008 | -0.003 | 0.312 | 0.512 |
| 307 | 0.000 | -0.007 | -0.003 | 0.308 | 0.507 |
| 308 | 0.000 | -0.007 | -0.002 | 0.304 | 0.503 |
| 309 | 0.000 | -0.007 | -0.002 | 0.301 | 0.499 |
| 310 | 0.000 | -0.007 | -0.003 | 0.298 | 0.496 |
| 311 | 0.000 | -0.007 | -0.003 | 0.296 | 0.494 |
| 312 | 0.000 | -0.007 | -0.003 | 0.294 | 0.492 |
| 313 | 0.000 | -0.007 | -0.003 | 0.293 | 0.491 |
| 314 | 0.000 | -0.007 | -0.003 | 0.291 | 0.490 |
| 315 | 0.000 | -0.007 | -0.003 | 0.289 | 0.490 |
| 316 | 0.000 | -0.007 | -0.003 | 0.287 | 0.489 |
| 317 | 0.000 | -0.007 | -0.003 | 0.285 | 0.488 |
| 318 | 0.000 | -0.007 | -0.003 | 0.283 | 0.488 |
| 319 | 0.000 | -0.008 | -0.003 | 0.281 | 0.488 |
| 320 | 0.000 | -0.008 | -0.003 | 0.280 | 0.488 |
| 321 | 0.000 | -0.007 | -0.002 | 0.278 | 0.488 |
| 322 | 0.000 | -0.007 | -0.002 | 0.277 | 0.488 |
| 323 | 0.000 | -0.007 | -0.003 | 0.275 | 0.489 |
| 324 | 0.000 | -0.007 | -0.003 | 0.274 | 0.491 |
| 325 | 0.000 | -0.007 | -0.002 | 0.273 | 0.493 |
| 326 | 0.000 | -0.007 | -0.002 | 0.272 | 0.495 |
| 327 | 0.000 | -0.008 | -0.003 | 0.271 | 0.497 |
| 328 | 0.000 | -0.008 | -0.003 | 0.270 | 0.499 |
| 329 | 0.000 | -0.008 | -0.003 | 0.269 | 0.501 |
| 330 | 0.000 | -0.007 | -0.003 | 0.268 | 0.502 |
| 331 | 0.000 | -0.006 | -0.002 | 0.266 | 0.502 |
| 332 | 0.000 | -0.006 | -0.002 | 0.264 | 0.502 |
| 333 | 0.000 | -0.006 | -0.002 | 0.262 | 0.501 |
| 334 | 0.000 | -0.006 | -0.002 | 0.260 | 0.498 |
| 335 | 0.000 | -0.007 | -0.003 | 0.258 | 0.496 |
| 336 | 0.000 | -0.007 | -0.003 | 0.256 | 0.493 |
| 337 | 0.000 | -0.007 | -0.003 | 0.254 | 0.489 |
| 338 | 0.000 | -0.006 | -0.003 | 0.251 | 0.485 |
| 339 | 0.000 | -0.006 | -0.003 | 0.250 | 0.482 |
| 340 | 0.000 | -0.005 | -0.002 | 0.249 | 0.479 |

|     |       |        |        |       |       |
|-----|-------|--------|--------|-------|-------|
| 341 | 0.000 | -0.005 | -0.002 | 0.247 | 0.475 |
| 342 | 0.000 | -0.006 | -0.002 | 0.245 | 0.470 |
| 343 | 0.000 | -0.006 | -0.002 | 0.243 | 0.466 |
| 344 | 0.000 | -0.005 | -0.002 | 0.242 | 0.462 |
| 345 | 0.000 | -0.005 | -0.002 | 0.241 | 0.458 |
| 346 | 0.000 | -0.005 | -0.002 | 0.240 | 0.454 |
| 347 | 0.000 | -0.006 | -0.002 | 0.239 | 0.450 |
| 348 | 0.000 | -0.007 | -0.003 | 0.239 | 0.448 |
| 349 | 0.000 | -0.006 | -0.003 | 0.239 | 0.446 |
| 350 | 0.000 | -0.006 | -0.002 | 0.239 | 0.445 |
| 351 | 0.000 | -0.005 | -0.002 | 0.240 | 0.445 |
| 352 | 0.000 | -0.005 | -0.002 | 0.243 | 0.446 |
| 353 | 0.000 | -0.005 | -0.002 | 0.245 | 0.448 |
| 354 | 0.000 | -0.006 | -0.002 | 0.247 | 0.451 |
| 355 | 0.000 | -0.007 | -0.002 | 0.249 | 0.454 |
| 356 | 0.000 | -0.007 | -0.003 | 0.251 | 0.458 |
| 357 | 0.000 | -0.008 | -0.003 | 0.254 | 0.462 |
| 358 | 0.000 | -0.008 | -0.003 | 0.256 | 0.467 |
| 359 | 0.000 | -0.008 | -0.003 | 0.260 | 0.472 |
| 360 | 0.000 | -0.008 | -0.003 | 0.264 | 0.478 |
| 361 | 0.000 | -0.009 | -0.003 | 0.268 | 0.484 |
| 362 | 0.000 | -0.009 | -0.003 | 0.271 | 0.489 |
| 363 | 0.000 | -0.009 | -0.004 | 0.274 | 0.495 |
| 364 | 0.000 | -0.009 | -0.004 | 0.277 | 0.500 |
| 365 | 0.000 | -0.009 | -0.004 | 0.282 | 0.506 |
| 366 | 0.000 | -0.008 | -0.003 | 0.286 | 0.513 |
| 367 | 0.000 | -0.006 | -0.003 | 0.291 | 0.520 |
| 368 | 0.000 | -0.006 | -0.003 | 0.296 | 0.527 |
| 369 | 0.000 | -0.006 | -0.003 | 0.301 | 0.536 |
| 370 | 0.000 | -0.005 | -0.002 | 0.305 | 0.545 |
| 371 | 0.000 | -0.006 | -0.002 | 0.310 | 0.553 |
| 372 | 0.000 | -0.005 | -0.002 | 0.314 | 0.562 |
| 373 | 0.000 | -0.004 | -0.002 | 0.319 | 0.571 |
| 374 | 0.000 | -0.004 | -0.002 | 0.322 | 0.579 |
| 375 | 0.000 | -0.006 | -0.002 | 0.325 | 0.586 |
| 376 | 0.000 | -0.005 | -0.002 | 0.328 | 0.593 |
| 377 | 0.000 | -0.005 | -0.002 | 0.331 | 0.600 |
| 378 | 0.000 | -0.006 | -0.002 | 0.333 | 0.607 |
| 379 | 0.000 | -0.006 | -0.002 | 0.336 | 0.613 |
| 380 | 0.000 | -0.006 | -0.002 | 0.338 | 0.618 |
| 381 | 0.000 | -0.006 | -0.003 | 0.340 | 0.624 |
| 382 | 0.000 | -0.005 | -0.002 | 0.342 | 0.629 |
| 383 | 0.000 | -0.004 | -0.002 | 0.344 | 0.634 |
| 384 | 0.000 | -0.004 | -0.002 | 0.347 | 0.638 |
| 385 | 0.000 | -0.004 | -0.002 | 0.349 | 0.641 |
| 386 | 0.000 | -0.004 | -0.002 | 0.351 | 0.644 |
| 387 | 0.000 | -0.005 | -0.002 | 0.353 | 0.647 |
| 388 | 0.000 | -0.004 | -0.002 | 0.356 | 0.650 |
| 389 | 0.000 | -0.004 | -0.002 | 0.359 | 0.652 |
| 390 | 0.000 | -0.004 | -0.002 | 0.362 | 0.655 |
| 391 | 0.000 | -0.005 | -0.002 | 0.365 | 0.658 |
| 392 | 0.000 | -0.005 | -0.002 | 0.369 | 0.661 |
| 393 | 0.000 | -0.005 | -0.002 | 0.374 | 0.665 |
| 394 | 0.000 | -0.005 | -0.002 | 0.379 | 0.670 |
| 395 | 0.000 | -0.005 | -0.002 | 0.386 | 0.676 |
| 396 | 0.000 | -0.005 | -0.003 | 0.393 | 0.685 |

|     |       |        |        |       |       |
|-----|-------|--------|--------|-------|-------|
| 397 | 0.000 | -0.004 | -0.002 | 0.400 | 0.695 |
| 398 | 0.000 | -0.004 | -0.002 | 0.409 | 0.708 |
| 399 | 0.000 | -0.003 | -0.002 | 0.419 | 0.723 |
| 400 | 0.000 | -0.003 | -0.002 | 0.430 | 0.742 |
| 401 | 0.000 | -0.003 | -0.002 | 0.441 | 0.762 |
| 402 | 0.000 | -0.003 | -0.002 | 0.453 | 0.785 |
| 403 | 0.000 | -0.003 | -0.002 | 0.465 | 0.808 |
| 404 | 0.000 | -0.003 | -0.002 | 0.476 | 0.833 |
| 405 | 0.000 | -0.003 | -0.002 | 0.487 | 0.858 |
| 406 | 0.000 | -0.003 | -0.002 | 0.498 | 0.882 |
| 407 | 0.000 | -0.003 | -0.002 | 0.509 | 0.906 |
| 408 | 0.000 | -0.003 | -0.002 | 0.519 | 0.930 |
| 409 | 0.000 | -0.003 | -0.002 | 0.528 | 0.952 |
| 410 | 0.000 | -0.003 | -0.002 | 0.537 | 0.973 |
| 411 | 0.000 | -0.003 | -0.002 | 0.544 | 0.992 |
| 412 | 0.000 | -0.003 | -0.002 | 0.550 | 1.008 |
| 413 | 0.000 | -0.003 | -0.002 | 0.554 | 1.022 |
| 414 | 0.000 | -0.003 | -0.002 | 0.557 | 1.034 |
| 415 | 0.000 | -0.003 | -0.002 | 0.560 | 1.045 |
| 416 | 0.000 | -0.003 | -0.002 | 0.562 | 1.053 |
| 417 | 0.000 | -0.003 | -0.002 | 0.565 | 1.061 |
| 418 | 0.000 | -0.002 | -0.002 | 0.569 | 1.068 |
| 419 | 0.000 | -0.002 | -0.002 | 0.573 | 1.077 |
| 420 | 0.000 | -0.003 | -0.002 | 0.579 | 1.090 |
| 421 | 0.000 | -0.003 | -0.002 | 0.588 | 1.105 |
| 422 | 0.000 | -0.003 | -0.002 | 0.597 | 1.123 |
| 423 | 0.000 | -0.002 | -0.002 | 0.608 | 1.144 |
| 424 | 0.000 | -0.003 | -0.002 | 0.619 | 1.168 |
| 425 | 0.000 | -0.003 | -0.003 | 0.631 | 1.198 |
| 426 | 0.000 | -0.003 | -0.002 | 0.643 | 1.229 |
| 427 | 0.000 | -0.003 | -0.002 | 0.654 | 1.263 |
| 428 | 0.000 | -0.003 | -0.002 | 0.665 | 1.297 |
| 429 | 0.000 | -0.003 | -0.002 | 0.673 | 1.331 |
| 430 | 0.000 | -0.003 | -0.002 | 0.679 | 1.364 |
| 431 | 0.000 | -0.003 | -0.002 | 0.681 | 1.393 |
| 432 | 0.000 | -0.003 | -0.002 | 0.678 | 1.416 |
| 433 | 0.000 | -0.003 | -0.002 | 0.671 | 1.432 |
| 434 | 0.000 | -0.002 | -0.002 | 0.659 | 1.437 |
| 435 | 0.000 | -0.002 | -0.002 | 0.643 | 1.433 |
| 436 | 0.000 | -0.002 | -0.002 | 0.624 | 1.419 |
| 437 | 0.000 | -0.002 | -0.002 | 0.603 | 1.393 |
| 438 | 0.000 | -0.002 | -0.002 | 0.581 | 1.360 |
| 439 | 0.000 | -0.002 | -0.002 | 0.560 | 1.320 |
| 440 | 0.000 | -0.002 | -0.002 | 0.540 | 1.276 |
| 441 | 0.000 | -0.002 | -0.002 | 0.522 | 1.229 |
| 442 | 0.000 | -0.003 | -0.002 | 0.506 | 1.180 |
| 443 | 0.000 | -0.003 | -0.002 | 0.492 | 1.132 |
| 444 | 0.000 | -0.003 | -0.002 | 0.480 | 1.086 |
| 445 | 0.000 | -0.003 | -0.002 | 0.469 | 1.039 |
| 446 | 0.000 | -0.002 | -0.002 | 0.459 | 0.996 |
| 447 | 0.000 | -0.002 | -0.002 | 0.451 | 0.960 |
| 448 | 0.000 | -0.002 | -0.002 | 0.445 | 0.929 |
| 449 | 0.000 | -0.002 | -0.002 | 0.439 | 0.902 |
| 450 | 0.000 | -0.002 | -0.002 | 0.434 | 0.879 |
| 451 | 0.000 | -0.002 | -0.002 | 0.429 | 0.861 |
| 452 | 0.000 | -0.002 | -0.002 | 0.424 | 0.846 |

|     |       |        |        |       |       |
|-----|-------|--------|--------|-------|-------|
| 453 | 0.000 | -0.002 | -0.002 | 0.420 | 0.836 |
| 454 | 0.000 | -0.002 | -0.002 | 0.416 | 0.829 |
| 455 | 0.000 | -0.002 | -0.002 | 0.413 | 0.825 |
| 456 | 0.000 | -0.002 | -0.002 | 0.409 | 0.825 |
| 457 | 0.000 | -0.002 | -0.002 | 0.407 | 0.826 |
| 458 | 0.000 | -0.002 | -0.002 | 0.404 | 0.830 |
| 459 | 0.000 | -0.002 | -0.002 | 0.402 | 0.833 |
| 460 | 0.000 | -0.002 | -0.002 | 0.400 | 0.838 |
| 461 | 0.000 | -0.002 | -0.002 | 0.398 | 0.843 |
| 462 | 0.000 | -0.002 | -0.002 | 0.397 | 0.849 |
| 463 | 0.000 | -0.003 | -0.002 | 0.394 | 0.853 |
| 464 | 0.000 | -0.003 | -0.002 | 0.392 | 0.855 |
| 465 | 0.000 | -0.003 | -0.002 | 0.388 | 0.854 |
| 466 | 0.000 | -0.003 | -0.002 | 0.383 | 0.851 |
| 467 | 0.000 | -0.003 | -0.002 | 0.378 | 0.845 |
| 468 | 0.000 | -0.003 | -0.002 | 0.372 | 0.834 |
| 469 | 0.000 | -0.003 | -0.002 | 0.364 | 0.819 |
| 470 | 0.000 | -0.003 | -0.003 | 0.356 | 0.801 |
| 471 | 0.000 | -0.003 | -0.002 | 0.346 | 0.779 |
| 472 | 0.000 | -0.002 | -0.002 | 0.335 | 0.754 |
| 473 | 0.000 | -0.002 | -0.002 | 0.322 | 0.724 |
| 474 | 0.000 | -0.002 | -0.002 | 0.309 | 0.692 |
| 475 | 0.000 | -0.002 | -0.002 | 0.295 | 0.658 |
| 476 | 0.000 | -0.002 | -0.002 | 0.280 | 0.622 |
| 477 | 0.000 | -0.002 | -0.002 | 0.265 | 0.586 |
| 478 | 0.000 | -0.002 | -0.002 | 0.250 | 0.550 |
| 479 | 0.000 | -0.002 | -0.002 | 0.235 | 0.513 |
| 480 | 0.000 | -0.002 | -0.002 | 0.220 | 0.476 |
| 481 | 0.000 | -0.002 | -0.002 | 0.204 | 0.439 |
| 482 | 0.000 | -0.002 | -0.002 | 0.188 | 0.403 |
| 483 | 0.000 | -0.002 | -0.002 | 0.174 | 0.370 |
| 484 | 0.000 | -0.002 | -0.002 | 0.161 | 0.342 |
| 485 | 0.000 | -0.002 | -0.002 | 0.150 | 0.317 |
| 486 | 0.000 | -0.002 | -0.002 | 0.139 | 0.293 |
| 487 | 0.000 | -0.003 | -0.003 | 0.129 | 0.270 |
| 488 | 0.000 | -0.002 | -0.003 | 0.119 | 0.248 |
| 489 | 0.000 | -0.002 | -0.002 | 0.110 | 0.228 |
| 490 | 0.000 | -0.002 | -0.003 | 0.101 | 0.209 |
| 491 | 0.000 | -0.002 | -0.003 | 0.094 | 0.191 |
| 492 | 0.000 | -0.002 | -0.002 | 0.087 | 0.176 |
| 493 | 0.000 | -0.002 | -0.002 | 0.081 | 0.162 |
| 494 | 0.000 | -0.002 | -0.002 | 0.075 | 0.150 |
| 495 | 0.000 | -0.002 | -0.002 | 0.070 | 0.138 |
| 496 | 0.000 | -0.002 | -0.002 | 0.065 | 0.128 |
| 497 | 0.000 | -0.002 | -0.002 | 0.061 | 0.118 |
| 498 | 0.000 | -0.002 | -0.002 | 0.057 | 0.110 |
| 499 | 0.000 | -0.002 | -0.002 | 0.053 | 0.102 |
| 500 | 0.000 | -0.002 | -0.002 | 0.050 | 0.096 |
| 501 | 0.000 | -0.002 | -0.002 | 0.047 | 0.090 |
| 502 | 0.000 | -0.002 | -0.001 | 0.045 | 0.085 |
| 503 | 0.000 | -0.002 | -0.002 | 0.043 | 0.080 |
| 504 | 0.000 | -0.002 | -0.002 | 0.041 | 0.075 |
| 505 | 0.000 | -0.002 | -0.002 | 0.040 | 0.071 |
| 506 | 0.000 | -0.002 | -0.002 | 0.037 | 0.067 |
| 507 | 0.000 | -0.002 | -0.002 | 0.036 | 0.063 |
| 508 | 0.000 | -0.002 | -0.002 | 0.035 | 0.061 |

|     |       |        |        |       |       |
|-----|-------|--------|--------|-------|-------|
| 509 | 0.000 | -0.002 | -0.002 | 0.034 | 0.058 |
| 510 | 0.000 | -0.002 | -0.002 | 0.032 | 0.055 |
| 511 | 0.000 | -0.002 | -0.002 | 0.031 | 0.053 |
| 512 | 0.000 | -0.002 | -0.002 | 0.030 | 0.051 |
| 513 | 0.000 | -0.002 | -0.002 | 0.028 | 0.050 |
| 514 | 0.000 | -0.002 | -0.002 | 0.027 | 0.049 |
| 515 | 0.000 | -0.002 | -0.002 | 0.027 | 0.047 |
| 516 | 0.000 | -0.002 | -0.002 | 0.027 | 0.046 |
| 517 | 0.000 | -0.002 | -0.002 | 0.026 | 0.045 |
| 518 | 0.000 | -0.002 | -0.002 | 0.026 | 0.045 |
| 519 | 0.000 | -0.002 | -0.002 | 0.025 | 0.044 |
| 520 | 0.000 | -0.002 | -0.002 | 0.026 | 0.044 |
| 521 | 0.000 | -0.003 | -0.002 | 0.026 | 0.044 |
| 522 | 0.000 | -0.003 | -0.002 | 0.026 | 0.045 |
| 523 | 0.000 | -0.002 | -0.001 | 0.027 | 0.046 |
| 524 | 0.000 | -0.002 | -0.002 | 0.028 | 0.046 |
| 525 | 0.000 | -0.002 | -0.002 | 0.029 | 0.047 |
| 526 | 0.000 | -0.002 | -0.002 | 0.029 | 0.048 |
| 527 | 0.000 | -0.002 | -0.002 | 0.029 | 0.048 |
| 528 | 0.000 | -0.002 | -0.003 | 0.029 | 0.048 |
| 529 | 0.000 | -0.002 | -0.002 | 0.030 | 0.049 |
| 530 | 0.000 | -0.002 | -0.003 | 0.031 | 0.049 |
| 531 | 0.000 | -0.003 | -0.003 | 0.031 | 0.049 |
| 532 | 0.000 | -0.003 | -0.003 | 0.033 | 0.050 |
| 533 | 0.000 | -0.002 | -0.003 | 0.034 | 0.051 |
| 534 | 0.000 | -0.002 | -0.003 | 0.034 | 0.051 |
| 535 | 0.000 | -0.002 | -0.003 | 0.034 | 0.052 |
| 536 | 0.000 | -0.003 | -0.003 | 0.034 | 0.053 |
| 537 | 0.000 | -0.002 | -0.002 | 0.033 | 0.053 |
| 538 | 0.000 | -0.002 | -0.002 | 0.032 | 0.053 |
| 539 | 0.000 | -0.002 | -0.002 | 0.032 | 0.053 |
| 540 | 0.000 | -0.002 | -0.002 | 0.031 | 0.053 |
| 541 | 0.000 | -0.002 | -0.002 | 0.031 | 0.053 |
| 542 | 0.000 | -0.002 | -0.002 | 0.030 | 0.053 |
| 543 | 0.000 | -0.003 | -0.003 | 0.029 | 0.052 |
| 544 | 0.000 | -0.003 | -0.003 | 0.028 | 0.052 |
| 545 | 0.000 | -0.003 | -0.003 | 0.028 | 0.051 |
| 546 | 0.000 | -0.003 | -0.003 | 0.027 | 0.052 |
| 547 | 0.000 | -0.003 | -0.002 | 0.027 | 0.052 |
| 548 | 0.000 | -0.002 | -0.002 | 0.027 | 0.052 |
| 549 | 0.000 | -0.003 | -0.002 | 0.027 | 0.051 |
| 550 | 0.000 | -0.003 | -0.002 | 0.026 | 0.050 |
| 551 | 0.000 | -0.006 | -0.002 | 0.024 | 0.049 |
| 552 | 0.000 | -0.007 | -0.002 | 0.024 | 0.049 |
| 553 | 0.000 | -0.006 | -0.002 | 0.024 | 0.050 |
| 554 | 0.000 | -0.006 | -0.002 | 0.025 | 0.050 |
| 555 | 0.000 | -0.006 | -0.002 | 0.025 | 0.051 |
| 556 | 0.000 | -0.007 | -0.002 | 0.025 | 0.052 |
| 557 | 0.000 | -0.007 | -0.002 | 0.026 | 0.053 |
| 558 | 0.000 | -0.007 | -0.003 | 0.026 | 0.054 |
| 559 | 0.000 | -0.007 | -0.003 | 0.027 | 0.055 |
| 560 | 0.000 | -0.007 | -0.003 | 0.028 | 0.056 |
| 561 | 0.000 | -0.007 | -0.003 | 0.029 | 0.058 |
| 562 | 0.000 | -0.006 | -0.002 | 0.031 | 0.060 |
| 563 | 0.000 | -0.006 | -0.002 | 0.032 | 0.063 |
| 564 | 0.000 | -0.006 | -0.002 | 0.033 | 0.065 |

|     |       |        |        |       |       |
|-----|-------|--------|--------|-------|-------|
| 565 | 0.000 | -0.007 | -0.002 | 0.034 | 0.067 |
| 566 | 0.000 | -0.007 | -0.002 | 0.034 | 0.069 |
| 567 | 0.000 | -0.008 | -0.003 | 0.035 | 0.071 |
| 568 | 0.000 | -0.008 | -0.003 | 0.036 | 0.074 |
| 569 | 0.000 | -0.007 | -0.002 | 0.038 | 0.076 |
| 570 | 0.000 | -0.006 | -0.002 | 0.038 | 0.078 |
| 571 | 0.000 | -0.007 | -0.002 | 0.039 | 0.080 |
| 572 | 0.000 | -0.007 | -0.002 | 0.040 | 0.083 |
| 573 | 0.000 | -0.007 | -0.002 | 0.041 | 0.085 |
| 574 | 0.000 | -0.007 | -0.002 | 0.042 | 0.087 |
| 575 | 0.000 | -0.007 | -0.002 | 0.042 | 0.089 |
| 576 | 0.000 | -0.007 | -0.002 | 0.042 | 0.091 |
| 577 | 0.000 | -0.007 | -0.003 | 0.042 | 0.093 |
| 578 | 0.000 | -0.007 | -0.003 | 0.043 | 0.095 |
| 579 | 0.000 | -0.007 | -0.003 | 0.043 | 0.096 |
| 580 | 0.000 | -0.007 | -0.003 | 0.043 | 0.097 |
| 581 | 0.000 | -0.008 | -0.003 | 0.043 | 0.098 |
| 582 | 0.000 | -0.008 | -0.003 | 0.043 | 0.099 |
| 583 | 0.000 | -0.007 | -0.002 | 0.043 | 0.100 |
| 584 | 0.000 | -0.006 | -0.002 | 0.043 | 0.100 |
| 585 | 0.000 | -0.006 | -0.002 | 0.043 | 0.100 |
| 586 | 0.000 | -0.006 | -0.002 | 0.044 | 0.101 |
| 587 | 0.000 | -0.006 | -0.002 | 0.043 | 0.101 |
| 588 | 0.000 | -0.007 | -0.003 | 0.043 | 0.101 |
| 589 | 0.000 | -0.007 | -0.003 | 0.044 | 0.102 |
| 590 | 0.000 | -0.005 | -0.002 | 0.044 | 0.103 |
| 591 | 0.000 | -0.005 | -0.002 | 0.046 | 0.103 |
| 592 | 0.000 | -0.005 | -0.002 | 0.046 | 0.104 |
| 593 | 0.000 | -0.005 | -0.002 | 0.047 | 0.106 |
| 594 | 0.000 | -0.006 | -0.002 | 0.048 | 0.106 |
| 595 | 0.000 | -0.006 | -0.002 | 0.049 | 0.107 |
| 596 | 0.000 | -0.007 | -0.002 | 0.049 | 0.109 |
| 597 | 0.000 | -0.007 | -0.002 | 0.051 | 0.111 |
| 598 | 0.000 | -0.007 | -0.002 | 0.052 | 0.113 |
| 599 | 0.000 | -0.007 | -0.003 | 0.054 | 0.115 |
| 600 | 0.000 | -0.008 | -0.003 | 0.055 | 0.117 |
| 601 | 0.000 | -0.008 | -0.002 | 0.057 | 0.121 |
| 602 | 0.000 | -0.007 | -0.002 | 0.060 | 0.125 |
| 603 | 0.000 | -0.007 | -0.002 | 0.062 | 0.129 |
| 604 | 0.000 | -0.007 | -0.002 | 0.064 | 0.132 |
| 605 | 0.000 | -0.007 | -0.003 | 0.066 | 0.135 |
| 606 | 0.000 | -0.007 | -0.003 | 0.067 | 0.138 |
| 607 | 0.000 | -0.007 | -0.004 | 0.069 | 0.141 |
| 608 | 0.000 | -0.007 | -0.003 | 0.071 | 0.144 |
| 609 | 0.000 | -0.006 | -0.003 | 0.072 | 0.148 |
| 610 | 0.000 | -0.007 | -0.003 | 0.073 | 0.151 |
| 611 | 0.000 | -0.006 | -0.003 | 0.075 | 0.155 |
| 612 | 0.000 | -0.006 | -0.002 | 0.076 | 0.159 |
| 613 | 0.000 | -0.007 | -0.003 | 0.076 | 0.161 |
| 614 | 0.000 | -0.007 | -0.003 | 0.076 | 0.162 |
| 615 | 0.000 | -0.008 | -0.003 | 0.075 | 0.164 |
| 616 | 0.000 | -0.008 | -0.003 | 0.075 | 0.165 |
| 617 | 0.000 | -0.007 | -0.003 | 0.077 | 0.167 |
| 618 | 0.000 | -0.007 | -0.003 | 0.078 | 0.169 |
| 619 | 0.000 | -0.007 | -0.002 | 0.077 | 0.169 |
| 620 | 0.000 | -0.006 | -0.002 | 0.076 | 0.169 |

|     |       |        |        |       |       |
|-----|-------|--------|--------|-------|-------|
| 621 | 0.000 | -0.006 | -0.002 | 0.074 | 0.168 |
| 622 | 0.000 | -0.006 | -0.002 | 0.073 | 0.168 |
| 623 | 0.000 | -0.006 | -0.002 | 0.073 | 0.167 |
| 624 | 0.000 | -0.006 | -0.002 | 0.071 | 0.166 |
| 625 | 0.000 | -0.006 | -0.002 | 0.071 | 0.164 |
| 626 | 0.000 | -0.007 | -0.002 | 0.070 | 0.162 |
| 627 | 0.000 | -0.008 | -0.003 | 0.069 | 0.160 |
| 628 | 0.000 | -0.007 | -0.003 | 0.068 | 0.160 |
| 629 | 0.000 | -0.006 | -0.002 | 0.068 | 0.160 |
| 630 | 0.000 | -0.005 | -0.002 | 0.070 | 0.160 |
| 631 | 0.000 | -0.006 | -0.003 | 0.072 | 0.159 |
| 632 | 0.000 | -0.006 | -0.003 | 0.073 | 0.160 |
| 633 | 0.000 | -0.007 | -0.003 | 0.074 | 0.162 |
| 634 | 0.000 | -0.007 | -0.003 | 0.077 | 0.165 |
| 635 | 0.000 | -0.008 | -0.003 | 0.081 | 0.169 |
| 636 | 0.000 | -0.007 | -0.003 | 0.085 | 0.173 |
| 637 | 0.000 | -0.007 | -0.003 | 0.090 | 0.181 |
| 638 | 0.000 | -0.007 | -0.002 | 0.097 | 0.191 |
| 639 | 0.000 | -0.007 | -0.002 | 0.104 | 0.201 |
| 640 | 0.000 | -0.006 | -0.002 | 0.111 | 0.213 |
| 641 | 0.000 | -0.006 | -0.002 | 0.118 | 0.225 |
| 642 | 0.000 | -0.006 | -0.002 | 0.124 | 0.237 |
| 643 | 0.000 | -0.007 | -0.002 | 0.131 | 0.251 |
| 644 | 0.000 | -0.007 | -0.002 | 0.138 | 0.268 |
| 645 | 0.000 | -0.007 | -0.002 | 0.146 | 0.282 |
| 646 | 0.000 | -0.008 | -0.002 | 0.152 | 0.297 |
| 647 | 0.000 | -0.008 | -0.002 | 0.158 | 0.312 |
| 648 | 0.000 | -0.007 | -0.002 | 0.166 | 0.330 |
| 649 | 0.000 | -0.007 | -0.004 | 0.176 | 0.349 |
| 650 | 0.000 | -0.007 | -0.004 | 0.185 | 0.369 |
| 651 | 0.000 | -0.006 | -0.003 | 0.198 | 0.392 |
| 652 | 0.000 | -0.006 | -0.003 | 0.212 | 0.416 |
| 653 | 0.000 | -0.006 | -0.002 | 0.229 | 0.444 |
| 654 | 0.000 | -0.007 | -0.003 | 0.246 | 0.475 |
| 655 | 0.000 | -0.007 | -0.002 | 0.267 | 0.509 |
| 656 | 0.000 | -0.006 | -0.002 | 0.290 | 0.545 |
| 657 | 0.000 | -0.007 | -0.002 | 0.312 | 0.579 |
| 658 | 0.000 | -0.006 | -0.002 | 0.332 | 0.614 |
| 659 | 0.000 | -0.007 | -0.002 | 0.351 | 0.646 |
| 660 | 0.000 | -0.007 | -0.003 | 0.365 | 0.673 |
| 661 | 0.000 | -0.009 | -0.004 | 0.373 | 0.692 |
| 662 | 0.000 | -0.010 | -0.005 | 0.375 | 0.706 |
| 663 | 0.000 | -0.009 | -0.006 | 0.373 | 0.714 |
| 664 | 0.000 | -0.008 | -0.005 | 0.367 | 0.714 |
| 665 | 0.000 | -0.008 | -0.003 | 0.356 | 0.708 |
| 666 | 0.000 | -0.007 | -0.002 | 0.342 | 0.694 |
| 667 | 0.000 | -0.008 | -0.002 | 0.323 | 0.671 |
| 668 | 0.000 | -0.008 | -0.002 | 0.302 | 0.642 |
| 669 | 0.000 | -0.008 | -0.003 | 0.280 | 0.610 |
| 670 | 0.000 | -0.007 | -0.003 | 0.258 | 0.576 |
| 671 | 0.000 | -0.008 | -0.003 | 0.233 | 0.537 |
| 672 | 0.000 | -0.007 | -0.002 | 0.210 | 0.496 |
| 673 | 0.000 | -0.007 | -0.002 | 0.185 | 0.455 |
| 674 | 0.000 | -0.007 | -0.002 | 0.163 | 0.413 |
| 675 | 0.000 | -0.007 | -0.002 | 0.145 | 0.372 |
| 676 | 0.000 | -0.007 | -0.003 | 0.127 | 0.331 |



|     |       |        |        |        |       |
|-----|-------|--------|--------|--------|-------|
| 677 | 0.000 | -0.006 | -0.003 | 0.109  | 0.293 |
| 678 | 0.000 | -0.006 | -0.002 | 0.093  | 0.258 |
| 679 | 0.000 | -0.007 | -0.001 | 0.080  | 0.225 |
| 680 | 0.000 | -0.007 | -0.002 | 0.067  | 0.194 |
| 681 | 0.000 | -0.007 | -0.002 | 0.055  | 0.166 |
| 682 | 0.000 | -0.007 | -0.002 | 0.046  | 0.142 |
| 683 | 0.000 | -0.007 | -0.002 | 0.038  | 0.122 |
| 684 | 0.000 | -0.008 | -0.003 | 0.031  | 0.102 |
| 685 | 0.000 | -0.007 | -0.003 | 0.026  | 0.087 |
| 686 | 0.000 | -0.006 | -0.003 | 0.022  | 0.073 |
| 687 | 0.000 | -0.006 | -0.002 | 0.019  | 0.061 |
| 688 | 0.000 | -0.006 | -0.002 | 0.017  | 0.050 |
| 689 | 0.000 | -0.007 | -0.002 | 0.012  | 0.043 |
| 690 | 0.000 | -0.006 | -0.002 | 0.010  | 0.036 |
| 691 | 0.000 | -0.006 | -0.002 | 0.009  | 0.032 |
| 692 | 0.000 | -0.005 | -0.002 | 0.006  | 0.027 |
| 693 | 0.000 | -0.005 | -0.002 | 0.005  | 0.023 |
| 694 | 0.000 | -0.005 | -0.002 | 0.004  | 0.020 |
| 695 | 0.000 | -0.005 | -0.002 | 0.003  | 0.018 |
| 696 | 0.000 | -0.005 | -0.002 | 0.003  | 0.016 |
| 697 | 0.000 | -0.005 | -0.002 | 0.002  | 0.014 |
| 698 | 0.000 | -0.004 | -0.001 | 0.002  | 0.013 |
| 699 | 0.000 | -0.004 | -0.001 | 0.002  | 0.012 |
| 700 | 0.000 | -0.004 | -0.002 | 0.001  | 0.010 |
| 701 | 0.000 | -0.005 | -0.002 | 0.001  | 0.008 |
| 702 | 0.000 | -0.005 | -0.002 | 0.001  | 0.007 |
| 703 | 0.000 | -0.005 | -0.002 | 0.001  | 0.007 |
| 704 | 0.000 | -0.005 | -0.002 | 0.000  | 0.007 |
| 705 | 0.000 | -0.004 | -0.002 | 0.000  | 0.005 |
| 706 | 0.000 | -0.005 | -0.002 | 0.000  | 0.004 |
| 707 | 0.000 | -0.006 | -0.002 | 0.000  | 0.003 |
| 708 | 0.000 | -0.007 | -0.002 | 0.000  | 0.003 |
| 709 | 0.000 | -0.007 | -0.002 | 0.000  | 0.002 |
| 710 | 0.000 | -0.006 | -0.002 | 0.000  | 0.002 |
| 711 | 0.000 | -0.005 | -0.002 | 0.000  | 0.002 |
| 712 | 0.000 | -0.005 | -0.002 | 0.000  | 0.001 |
| 713 | 0.000 | -0.006 | -0.003 | 0.000  | 0.001 |
| 714 | 0.000 | -0.006 | -0.003 | 0.000  | 0.001 |
| 715 | 0.000 | -0.006 | -0.003 | 0.000  | 0.002 |
| 716 | 0.000 | -0.006 | -0.002 | 0.000  | 0.002 |
| 717 | 0.000 | -0.006 | -0.002 | 0.000  | 0.001 |
| 718 | 0.000 | -0.007 | -0.002 | 0.000  | 0.001 |
| 719 | 0.000 | -0.006 | -0.002 | 0.000  | 0.001 |
| 720 | 0.000 | -0.006 | -0.002 | 0.000  | 0.001 |
| 721 | 0.000 | -0.005 | -0.002 | 0.000  | 0.001 |
| 722 | 0.000 | -0.004 | -0.002 | 0.000  | 0.001 |
| 723 | 0.000 | -0.004 | -0.001 | 0.000  | 0.001 |
| 724 | 0.000 | -0.005 | -0.002 | 0.000  | 0.001 |
| 725 | 0.000 | -0.007 | -0.002 | -0.001 | 0.001 |
| 726 | 0.000 | -0.006 | -0.003 | 0.000  | 0.001 |
| 727 | 0.000 | -0.005 | -0.003 | 0.000  | 0.001 |
| 728 | 0.000 | -0.004 | -0.002 | 0.000  | 0.001 |
| 729 | 0.000 | -0.004 | -0.001 | 0.000  | 0.001 |
| 730 | 0.000 | -0.005 | -0.001 | 0.000  | 0.001 |
| 731 | 0.000 | -0.004 | -0.001 | 0.000  | 0.001 |
| 732 | 0.000 | -0.004 | -0.001 | 0.000  | 0.002 |

|     |       |        |        |        |       |
|-----|-------|--------|--------|--------|-------|
| 733 | 0.000 | -0.004 | -0.002 | 0.000  | 0.000 |
| 734 | 0.000 | -0.005 | -0.003 | 0.000  | 0.000 |
| 735 | 0.000 | -0.004 | -0.002 | 0.000  | 0.001 |
| 736 | 0.000 | -0.004 | -0.002 | 0.000  | 0.001 |
| 737 | 0.000 | -0.006 | -0.002 | 0.000  | 0.000 |
| 738 | 0.000 | -0.005 | -0.002 | 0.000  | 0.000 |
| 739 | 0.000 | -0.005 | -0.002 | 0.000  | 0.000 |
| 740 | 0.000 | -0.006 | -0.003 | 0.000  | 0.000 |
| 741 | 0.000 | -0.006 | -0.003 | -0.001 | 0.000 |
| 742 | 0.000 | -0.006 | -0.002 | -0.001 | 0.000 |
| 743 | 0.000 | -0.007 | -0.002 | 0.000  | 0.000 |
| 744 | 0.000 | -0.009 | -0.003 | -0.001 | 0.000 |
| 745 | 0.000 | -0.008 | -0.003 | -0.002 | 0.000 |
| 746 | 0.000 | -0.008 | -0.004 | -0.002 | 0.000 |
| 747 | 0.000 | -0.007 | -0.003 | -0.001 | 0.000 |
| 748 | 0.000 | -0.007 | -0.003 | -0.001 | 0.000 |
| 749 | 0.000 | -0.006 | -0.004 | -0.001 | 0.000 |
| 750 | 0.000 | -0.007 | -0.004 | 0.000  | 0.000 |
| 751 | 0.000 | -0.008 | -0.004 | 0.000  | 0.000 |
| 752 | 0.000 | -0.008 | -0.004 | -0.001 | 0.000 |
| 753 | 0.000 | -0.006 | -0.001 | -0.001 | 0.001 |
| 754 | 0.000 | -0.004 | -0.001 | -0.001 | 0.002 |
| 755 | 0.000 | -0.003 | -0.002 | 0.000  | 0.001 |
| 756 | 0.000 | -0.005 | -0.002 | 0.000  | 0.000 |
| 757 | 0.000 | -0.004 | -0.001 | 0.000  | 0.000 |
| 758 | 0.000 | -0.003 | 0.000  | 0.000  | 0.000 |
| 759 | 0.000 | -0.002 | 0.000  | 0.000  | 0.000 |
| 760 | 0.000 | -0.003 | -0.001 | 0.000  | 0.000 |
| 761 | 0.000 | -0.003 | -0.001 | -0.001 | 0.000 |
| 762 | 0.000 | -0.004 | -0.001 | -0.001 | 0.000 |
| 763 | 0.000 | -0.006 | -0.002 | -0.002 | 0.000 |
| 764 | 0.000 | -0.007 | -0.003 | -0.001 | 0.000 |
| 765 | 0.000 | -0.006 | -0.002 | -0.001 | 0.000 |
| 766 | 0.000 | -0.005 | -0.002 | -0.002 | 0.000 |
| 767 | 0.000 | -0.004 | -0.001 | -0.001 | 0.000 |
| 768 | 0.000 | -0.003 | 0.000  | -0.001 | 0.000 |
| 769 | 0.000 | -0.004 | -0.001 | -0.001 | 0.000 |
| 770 | 0.000 | -0.003 | -0.001 | 0.000  | 0.002 |
| 771 | 0.000 | -0.005 | -0.002 | -0.001 | 0.001 |
| 772 | 0.000 | -0.008 | -0.002 | 0.000  | 0.000 |
| 773 | 0.000 | -0.007 | -0.001 | -0.001 | 0.000 |
| 774 | 0.000 | -0.005 | -0.002 | -0.002 | 0.000 |
| 775 | 0.000 | -0.005 | -0.004 | -0.002 | 0.000 |
| 776 | 0.000 | -0.005 | -0.002 | 0.000  | 0.001 |
| 777 | 0.000 | -0.006 | 0.000  | 0.000  | 0.001 |
| 778 | 0.000 | -0.004 | -0.001 | 0.000  | 0.001 |
| 779 | 0.000 | -0.004 | 0.000  | 0.000  | 0.001 |
| 780 | 0.000 | -0.004 | 0.000  | 0.000  | 0.000 |
| 781 | 0.000 | -0.005 | -0.001 | 0.000  | 0.000 |
| 782 | 0.000 | -0.005 | -0.001 | 0.001  | 0.001 |
| 783 | 0.000 | -0.002 | -0.001 | 0.000  | 0.002 |
| 784 | 0.000 | -0.002 | -0.001 | 0.000  | 0.002 |
| 785 | 0.000 | -0.003 | -0.002 | 0.000  | 0.001 |
| 786 | 0.000 | -0.004 | -0.002 | 0.001  | 0.000 |
| 787 | 0.000 | -0.004 | -0.002 | 0.002  | 0.000 |
| 788 | 0.000 | -0.003 | -0.001 | 0.002  | 0.000 |

|     |       |        |        |        |       |
|-----|-------|--------|--------|--------|-------|
| 789 | 0.000 | -0.004 | -0.001 | 0.001  | 0.000 |
| 790 | 0.000 | -0.003 | 0.000  | 0.000  | 0.000 |
| 791 | 0.000 | -0.001 | -0.001 | 0.000  | 0.001 |
| 792 | 0.000 | -0.002 | -0.003 | 0.000  | 0.000 |
| 793 | 0.000 | -0.004 | -0.003 | -0.001 | 0.000 |
| 794 | 0.000 | -0.005 | -0.002 | 0.000  | 0.001 |
| 795 | 0.000 | -0.006 | -0.003 | 0.000  | 0.003 |
| 796 | 0.000 | -0.004 | -0.002 | 0.000  | 0.002 |
| 797 | 0.000 | -0.004 | -0.001 | 0.000  | 0.000 |
| 798 | 0.000 | -0.003 | -0.001 | 0.000  | 0.000 |
| 799 | 0.000 | -0.005 | -0.005 | -0.001 | 0.000 |
| 800 | 0.000 | -0.004 | -0.004 | -0.001 | 0.000 |

| YF                              | RF                                  |
|---------------------------------|-------------------------------------|
| <i>S. cheesmaniae</i><br>LA0421 | <i>S. lycopersicum</i><br>cv. Heinz |
| 005                             | 007                                 |
| no                              | <b>4 times</b>                      |
| 194,5                           | 329.2                               |

|   |   |
|---|---|
| 1 | 1 |
|---|---|

|       |       |
|-------|-------|
| 0.751 | 0.222 |
| 0.736 | 0.221 |
| 0.721 | 0.220 |
| 0.706 | 0.220 |
| 0.692 | 0.219 |
| 0.679 | 0.219 |
| 0.666 | 0.219 |
| 0.653 | 0.220 |
| 0.641 | 0.221 |
| 0.628 | 0.222 |
| 0.617 | 0.223 |
| 0.607 | 0.223 |
| 0.599 | 0.223 |
| 0.592 | 0.223 |
| 0.586 | 0.225 |
| 0.579 | 0.228 |
| 0.574 | 0.232 |
| 0.568 | 0.236 |
| 0.562 | 0.242 |
| 0.555 | 0.248 |
| 0.550 | 0.255 |
| 0.546 | 0.262 |
| 0.543 | 0.271 |
| 0.541 | 0.278 |
| 0.539 | 0.284 |
| 0.534 | 0.290 |
| 0.528 | 0.297 |
| 0.520 | 0.304 |
| 0.511 | 0.312 |
| 0.504 | 0.321 |
| 0.498 | 0.333 |
| 0.493 | 0.347 |
| 0.488 | 0.360 |
| 0.483 | 0.370 |
| 0.476 | 0.376 |

**Phytoene absorption maximum - at 285 nm; lutein maximum - at 331, 347 and 365 nm**

| Sample #   | Sample ID | Hexane |
|------------|-----------|--------|
| <b>001</b> |           |        |

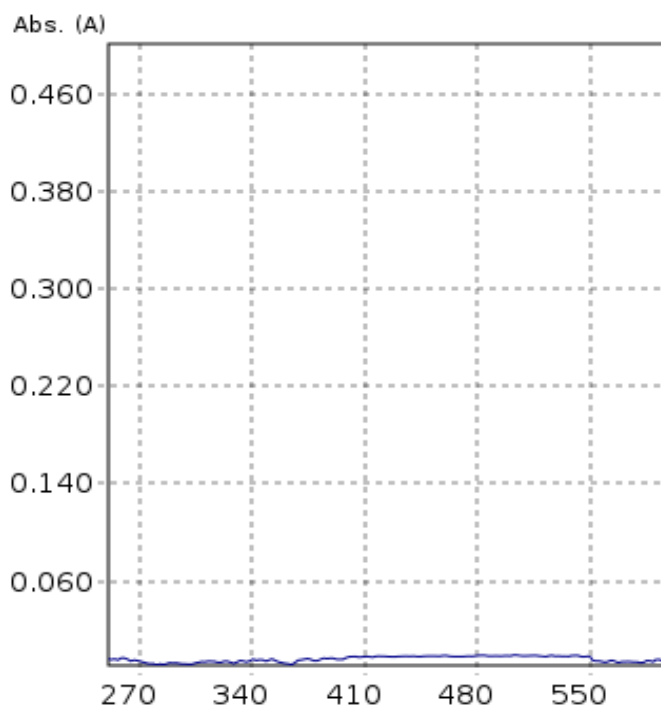

| Sample #   | Sample ID | Hexane |
|------------|-----------|--------|
| <b>002</b> |           |        |

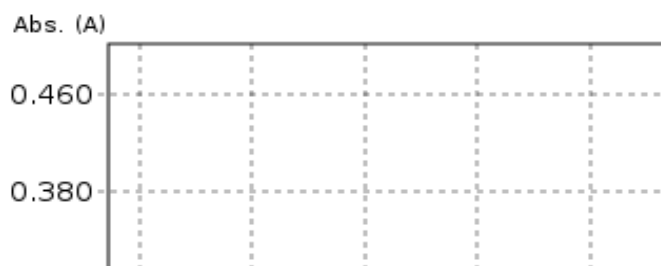

|       |       |
|-------|-------|
| 0.467 | 0.380 |
| 0.458 | 0.382 |
| 0.449 | 0.382 |
| 0.441 | 0.382 |
| 0.433 | 0.383 |
| 0.426 | 0.386 |
| 0.419 | 0.392 |
| 0.413 | 0.401 |
| 0.408 | 0.412 |
| 0.403 | 0.423 |
| 0.399 | 0.432 |
| 0.395 | 0.436 |
| 0.392 | 0.434 |
| 0.390 | 0.426 |
| 0.388 | 0.411 |
| 0.386 | 0.390 |
| 0.384 | 0.364 |
| 0.382 | 0.336 |
| 0.379 | 0.307 |
| 0.377 | 0.277 |
| 0.374 | 0.249 |
| 0.370 | 0.222 |
| 0.366 | 0.198 |
| 0.364 | 0.177 |
| 0.362 | 0.159 |
| 0.361 | 0.145 |
| 0.361 | 0.133 |
| 0.361 | 0.124 |
| 0.361 | 0.118 |
| 0.362 | 0.114 |
| 0.364 | 0.110 |
| 0.365 | 0.108 |
| 0.367 | 0.106 |
| 0.369 | 0.104 |
| 0.372 | 0.103 |
| 0.375 | 0.103 |
| 0.378 | 0.103 |
| 0.382 | 0.103 |
| 0.385 | 0.104 |
| 0.389 | 0.106 |
| 0.392 | 0.108 |
| 0.396 | 0.110 |
| 0.400 | 0.112 |
| 0.405 | 0.114 |
| 0.409 | 0.117 |
| 0.413 | 0.120 |
| 0.416 | 0.123 |
| 0.420 | 0.124 |
| 0.423 | 0.125 |
| 0.426 | 0.126 |
| 0.430 | 0.127 |
| 0.433 | 0.127 |
| 0.437 | 0.127 |
| 0.440 | 0.128 |
| 0.445 | 0.130 |
| 0.449 | 0.133 |

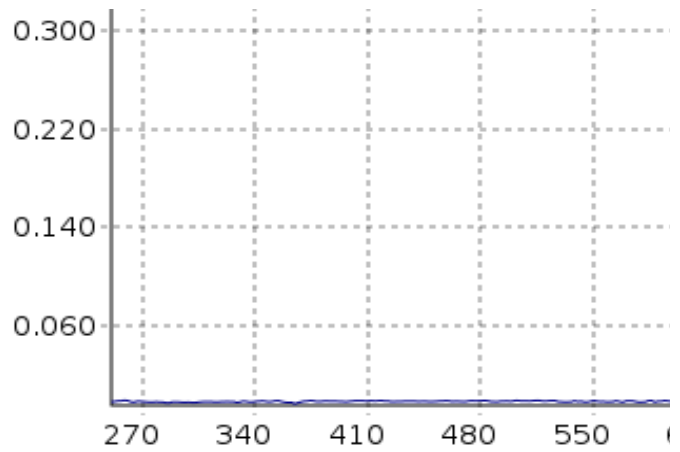

| Sample # | Sample ID | Species                        |
|----------|-----------|--------------------------------|
| 003      |           | <i>S. habrochaites</i> LA 2144 |

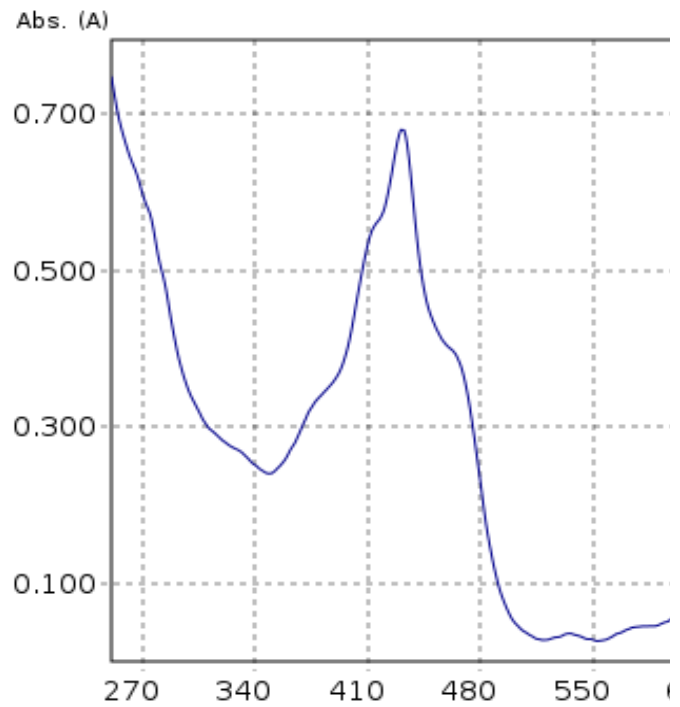

| Sample # | Sample ID | Species                    |
|----------|-----------|----------------------------|
| 004      |           | <i>S. pennellii</i> LA0716 |

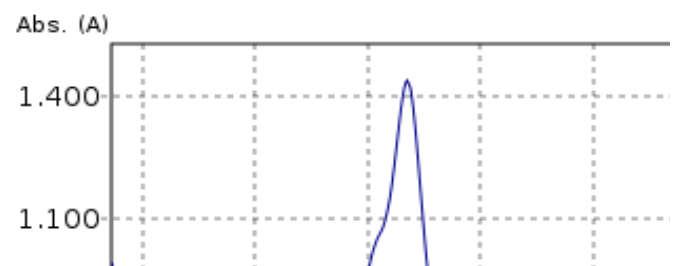

|       |       |
|-------|-------|
| 0.454 | 0.137 |
| 0.459 | 0.141 |
| 0.465 | 0.147 |
| 0.471 | 0.152 |
| 0.478 | 0.156 |
| 0.484 | 0.160 |
| 0.489 | 0.163 |
| 0.495 | 0.166 |
| 0.502 | 0.168 |
| 0.509 | 0.169 |
| 0.516 | 0.168 |
| 0.524 | 0.167 |
| 0.531 | 0.166 |
| 0.538 | 0.165 |
| 0.544 | 0.164 |
| 0.550 | 0.164 |
| 0.556 | 0.165 |
| 0.562 | 0.167 |
| 0.568 | 0.169 |
| 0.573 | 0.173 |
| 0.579 | 0.176 |
| 0.584 | 0.180 |
| 0.588 | 0.183 |
| 0.592 | 0.186 |
| 0.596 | 0.188 |
| 0.600 | 0.190 |
| 0.603 | 0.191 |
| 0.606 | 0.190 |
| 0.608 | 0.188 |
| 0.610 | 0.186 |
| 0.611 | 0.183 |
| 0.611 | 0.180 |
| 0.610 | 0.176 |
| 0.609 | 0.173 |
| 0.608 | 0.170 |
| 0.607 | 0.169 |
| 0.604 | 0.167 |
| 0.602 | 0.166 |
| 0.598 | 0.166 |
| 0.595 | 0.166 |
| 0.591 | 0.168 |
| 0.587 | 0.170 |
| 0.583 | 0.173 |
| 0.578 | 0.176 |
| 0.573 | 0.181 |
| 0.569 | 0.185 |
| 0.564 | 0.190 |
| 0.559 | 0.196 |
| 0.554 | 0.202 |
| 0.549 | 0.207 |
| 0.543 | 0.214 |
| 0.537 | 0.220 |
| 0.531 | 0.227 |
| 0.524 | 0.233 |
| 0.518 | 0.238 |
| 0.511 | 0.244 |

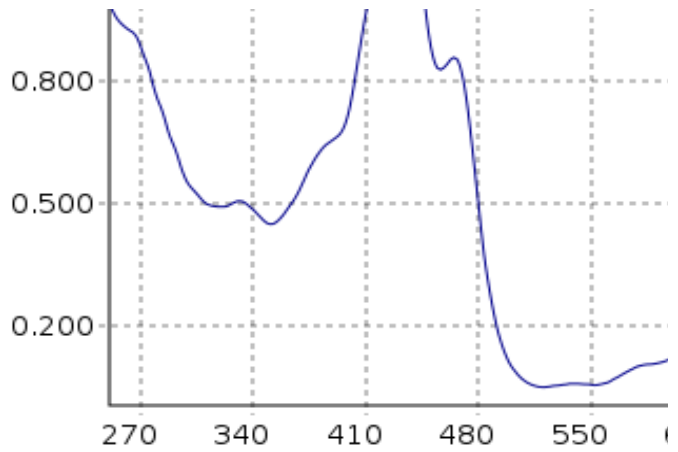

| Sample # | Sample ID | Species                      |
|----------|-----------|------------------------------|
| 005      |           | <i>S. cheesmaniae</i> LA0421 |

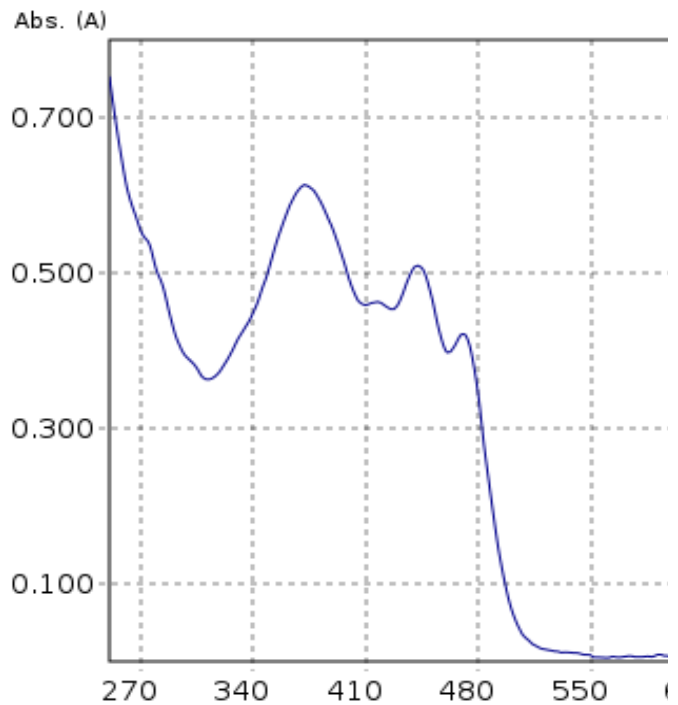

| Sample # | Sample ID | Species                          |
|----------|-----------|----------------------------------|
| 007      |           | <i>S. lycopersicum</i> cv. Heinz |

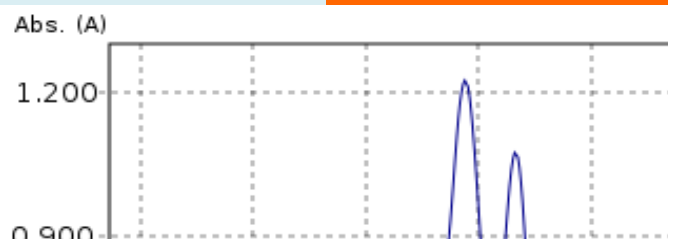

|       |       |
|-------|-------|
| 0.505 | 0.249 |
| 0.497 | 0.254 |
| 0.490 | 0.260 |
| 0.484 | 0.265 |
| 0.479 | 0.271 |
| 0.474 | 0.277 |
| 0.469 | 0.284 |
| 0.465 | 0.291 |
| 0.461 | 0.299 |
| 0.459 | 0.308 |
| 0.458 | 0.318 |
| 0.457 | 0.330 |
| 0.457 | 0.342 |
| 0.457 | 0.356 |
| 0.458 | 0.370 |
| 0.459 | 0.384 |
| 0.459 | 0.398 |
| 0.459 | 0.412 |
| 0.460 | 0.426 |
| 0.461 | 0.439 |
| 0.461 | 0.451 |
| 0.460 | 0.461 |
| 0.459 | 0.470 |
| 0.458 | 0.476 |
| 0.456 | 0.482 |
| 0.455 | 0.487 |
| 0.454 | 0.491 |
| 0.452 | 0.494 |
| 0.451 | 0.499 |
| 0.451 | 0.504 |
| 0.451 | 0.511 |
| 0.453 | 0.520 |
| 0.456 | 0.533 |
| 0.459 | 0.548 |
| 0.464 | 0.566 |
| 0.469 | 0.588 |
| 0.474 | 0.612 |
| 0.480 | 0.639 |
| 0.486 | 0.667 |
| 0.491 | 0.696 |
| 0.496 | 0.724 |
| 0.500 | 0.751 |
| 0.504 | 0.776 |
| 0.506 | 0.798 |
| 0.508 | 0.816 |
| 0.508 | 0.829 |
| 0.507 | 0.838 |
| 0.505 | 0.843 |
| 0.503 | 0.843 |
| 0.498 | 0.840 |
| 0.493 | 0.834 |
| 0.486 | 0.824 |
| 0.478 | 0.813 |
| 0.470 | 0.801 |
| 0.462 | 0.789 |
| 0.453 | 0.779 |

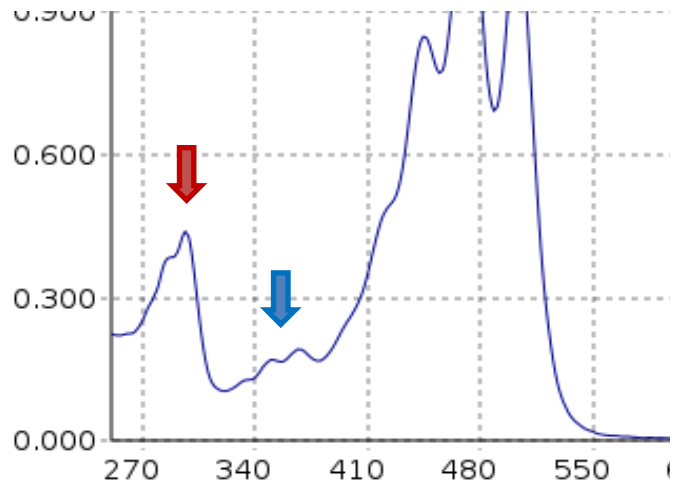

Phytoene absorption maximum - at 285 nm  
 absorption maximum - at 331, 347 and 360 nm

|       |       |
|-------|-------|
| 0.443 | 0.771 |
| 0.433 | 0.767 |
| 0.424 | 0.767 |
| 0.417 | 0.772 |
| 0.409 | 0.784 |
| 0.403 | 0.803 |
| 0.399 | 0.827 |
| 0.396 | 0.855 |
| 0.395 | 0.888 |
| 0.396 | 0.925 |
| 0.398 | 0.967 |
| 0.402 | 1.012 |
| 0.405 | 1.058 |
| 0.409 | 1.102 |
| 0.413 | 1.141 |
| 0.417 | 1.173 |
| 0.419 | 1.197 |
| 0.420 | 1.214 |
| 0.419 | 1.221 |
| 0.416 | 1.220 |
| 0.411 | 1.209 |
| 0.405 | 1.187 |
| 0.396 | 1.157 |
| 0.386 | 1.120 |
| 0.374 | 1.078 |
| 0.362 | 1.031 |
| 0.347 | 0.983 |
| 0.331 | 0.932 |
| 0.313 | 0.881 |
| 0.294 | 0.832 |
| 0.276 | 0.789 |
| 0.260 | 0.755 |
| 0.244 | 0.729 |
| 0.229 | 0.709 |
| 0.214 | 0.695 |
| 0.199 | 0.688 |
| 0.184 | 0.689 |
| 0.169 | 0.696 |
| 0.155 | 0.713 |
| 0.142 | 0.735 |
| 0.130 | 0.762 |
| 0.119 | 0.795 |
| 0.108 | 0.834 |
| 0.098 | 0.879 |
| 0.089 | 0.924 |
| 0.080 | 0.967 |
| 0.072 | 1.005 |
| 0.065 | 1.036 |
| 0.059 | 1.057 |
| 0.054 | 1.071 |
| 0.049 | 1.072 |
| 0.044 | 1.061 |
| 0.040 | 1.040 |
| 0.036 | 1.007 |
| 0.032 | 0.965 |
| 0.030 | 0.915 |



|       |       |
|-------|-------|
| 0.028 | 0.859 |
| 0.026 | 0.800 |
| 0.024 | 0.740 |
| 0.022 | 0.679 |
| 0.020 | 0.619 |
| 0.019 | 0.561 |
| 0.018 | 0.507 |
| 0.017 | 0.455 |
| 0.016 | 0.406 |
| 0.015 | 0.362 |
| 0.014 | 0.323 |
| 0.013 | 0.290 |
| 0.013 | 0.259 |
| 0.013 | 0.231 |
| 0.012 | 0.206 |
| 0.012 | 0.182 |
| 0.012 | 0.161 |
| 0.011 | 0.143 |
| 0.011 | 0.126 |
| 0.010 | 0.112 |
| 0.010 | 0.100 |
| 0.010 | 0.090 |
| 0.009 | 0.081 |
| 0.009 | 0.074 |
| 0.010 | 0.066 |
| 0.009 | 0.059 |
| 0.009 | 0.054 |
| 0.009 | 0.049 |
| 0.009 | 0.045 |
| 0.009 | 0.041 |
| 0.009 | 0.038 |
| 0.008 | 0.035 |
| 0.009 | 0.033 |
| 0.009 | 0.030 |
| 0.008 | 0.027 |
| 0.007 | 0.025 |
| 0.006 | 0.024 |
| 0.006 | 0.022 |
| 0.006 | 0.021 |
| 0.006 | 0.020 |
| 0.006 | 0.020 |
| 0.005 | 0.018 |
| 0.003 | 0.015 |
| 0.003 | 0.014 |
| 0.003 | 0.014 |
| 0.003 | 0.013 |
| 0.003 | 0.012 |
| 0.003 | 0.012 |
| 0.003 | 0.011 |
| 0.003 | 0.011 |
| 0.002 | 0.010 |
| 0.003 | 0.010 |
| 0.003 | 0.010 |
| 0.003 | 0.010 |
| 0.004 | 0.010 |
| 0.004 | 0.009 |

|       |       |
|-------|-------|
| 0.003 | 0.010 |
| 0.003 | 0.009 |
| 0.003 | 0.008 |
| 0.003 | 0.008 |
| 0.003 | 0.008 |
| 0.004 | 0.008 |
| 0.004 | 0.008 |
| 0.004 | 0.008 |
| 0.005 | 0.007 |
| 0.005 | 0.007 |
| 0.004 | 0.007 |
| 0.004 | 0.007 |
| 0.003 | 0.006 |
| 0.003 | 0.006 |
| 0.003 | 0.005 |
| 0.004 | 0.005 |
| 0.003 | 0.005 |
| 0.004 | 0.005 |
| 0.004 | 0.006 |
| 0.004 | 0.006 |
| 0.004 | 0.006 |
| 0.004 | 0.006 |
| 0.003 | 0.006 |
| 0.003 | 0.005 |
| 0.004 | 0.005 |
| 0.005 | 0.005 |
| 0.006 | 0.005 |
| 0.007 | 0.005 |
| 0.007 | 0.005 |
| 0.006 | 0.005 |
| 0.006 | 0.005 |
| 0.005 | 0.005 |
| 0.005 | 0.005 |
| 0.005 | 0.005 |
| 0.005 | 0.005 |
| 0.005 | 0.004 |
| 0.004 | 0.004 |
| 0.004 | 0.003 |
| 0.005 | 0.004 |
| 0.006 | 0.005 |
| 0.007 | 0.006 |
| 0.007 | 0.006 |
| 0.007 | 0.004 |
| 0.006 | 0.003 |
| 0.006 | 0.003 |
| 0.007 | 0.003 |
| 0.007 | 0.003 |
| 0.007 | 0.003 |
| 0.008 | 0.004 |
| 0.008 | 0.004 |
| 0.009 | 0.003 |
| 0.008 | 0.003 |
| 0.007 | 0.002 |
| 0.008 | 0.002 |
| 0.008 | 0.003 |
| 0.009 | 0.003 |
| 0.009 | 0.003 |
| 0.010 | 0.003 |

|       |       |
|-------|-------|
| 0.010 | 0.003 |
| 0.010 | 0.003 |
| 0.010 | 0.003 |
| 0.009 | 0.003 |
| 0.008 | 0.003 |
| 0.007 | 0.003 |
| 0.007 | 0.002 |
| 0.007 | 0.002 |
| 0.008 | 0.003 |
| 0.008 | 0.003 |
| 0.008 | 0.003 |
| 0.008 | 0.002 |
| 0.007 | 0.002 |
| 0.008 | 0.003 |
| 0.008 | 0.003 |
| 0.008 | 0.002 |
| 0.008 | 0.002 |
| 0.010 | 0.002 |
| 0.011 | 0.002 |
| 0.011 | 0.003 |
| 0.011 | 0.003 |
| 0.013 | 0.003 |
| 0.013 | 0.002 |
| 0.014 | 0.002 |
| 0.015 | 0.002 |
| 0.015 | 0.003 |
| 0.016 | 0.003 |
| 0.018 | 0.003 |
| 0.018 | 0.002 |
| 0.019 | 0.002 |
| 0.020 | 0.003 |
| 0.022 | 0.004 |
| 0.024 | 0.003 |
| 0.026 | 0.003 |
| 0.027 | 0.003 |
| 0.030 | 0.004 |
| 0.032 | 0.004 |
| 0.035 | 0.005 |
| 0.036 | 0.004 |
| 0.038 | 0.004 |
| 0.038 | 0.002 |
| 0.038 | 0.002 |
| 0.039 | 0.003 |
| 0.040 | 0.003 |
| 0.041 | 0.003 |
| 0.041 | 0.004 |
| 0.039 | 0.003 |
| 0.039 | 0.002 |
| 0.037 | 0.002 |
| 0.034 | 0.003 |
| 0.031 | 0.003 |
| 0.029 | 0.003 |
| 0.026 | 0.003 |
| 0.024 | 0.002 |
| 0.022 | 0.001 |
| 0.020 | 0.001 |



|        |       |
|--------|-------|
| 0.000  | 0.002 |
| 0.000  | 0.001 |
| 0.000  | 0.002 |
| 0.000  | 0.003 |
| -0.001 | 0.002 |
| -0.001 | 0.003 |
| -0.001 | 0.002 |
| -0.002 | 0.001 |
| -0.001 | 0.001 |
| -0.002 | 0.002 |
| -0.001 | 0.002 |
| -0.001 | 0.000 |
| -0.001 | 0.000 |
| -0.001 | 0.000 |
| -0.001 | 0.001 |
| -0.001 | 0.001 |
| -0.001 | 0.001 |
| 0.000  | 0.001 |
| -0.001 | 0.000 |
| -0.002 | 0.000 |
| -0.001 | 0.001 |
| -0.001 | 0.001 |
| -0.001 | 0.002 |
| -0.001 | 0.001 |
| 0.000  | 0.002 |
| 0.000  | 0.002 |
| 0.000  | 0.002 |
| 0.000  | 0.001 |
| -0.001 | 0.001 |
| -0.001 | 0.001 |
| -0.001 | 0.003 |
| -0.001 | 0.002 |
| -0.001 | 0.001 |
| -0.002 | 0.000 |
| -0.002 | 0.002 |
| -0.002 | 0.002 |
| -0.001 | 0.002 |
| 0.000  | 0.003 |
| -0.001 | 0.001 |
| -0.002 | 0.001 |
| -0.002 | 0.001 |
| -0.002 | 0.001 |
| 0.000  | 0.000 |
| 0.000  | 0.001 |
| 0.000  | 0.002 |
| 0.000  | 0.002 |
| 0.000  | 0.004 |
| 0.000  | 0.003 |
| 0.000  | 0.002 |
| -0.001 | 0.002 |
| 0.000  | 0.002 |
| 0.000  | 0.002 |
| 0.000  | 0.002 |
| 0.000  | 0.000 |
| -0.001 | 0.001 |
| 0.000  | 0.003 |

|        |       |
|--------|-------|
| -0.001 | 0.002 |
| -0.002 | 0.001 |
| -0.002 | 0.003 |
| -0.001 | 0.004 |
| -0.002 | 0.004 |
| -0.001 | 0.003 |
| 0.000  | 0.006 |
| 0.000  | 0.007 |
| 0.000  | 0.002 |
| 0.000  | 0.002 |
| 0.000  | 0.002 |
| 0.000  | 0.003 |

## Phytofluene absorption

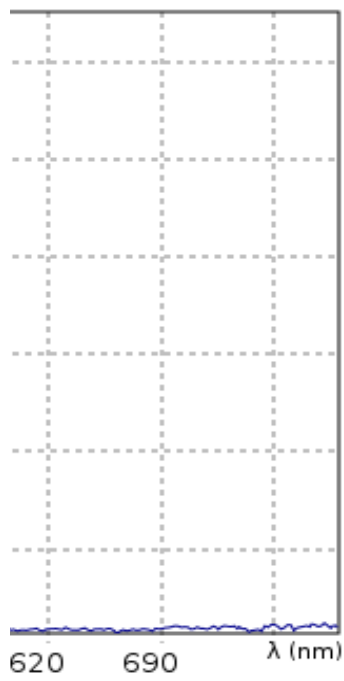

---

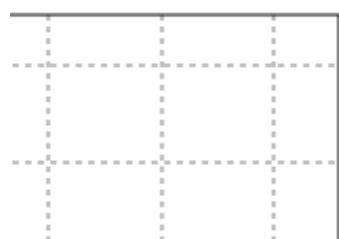

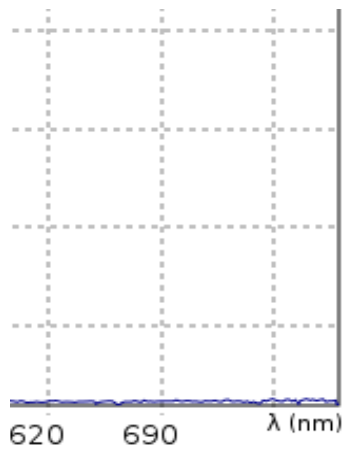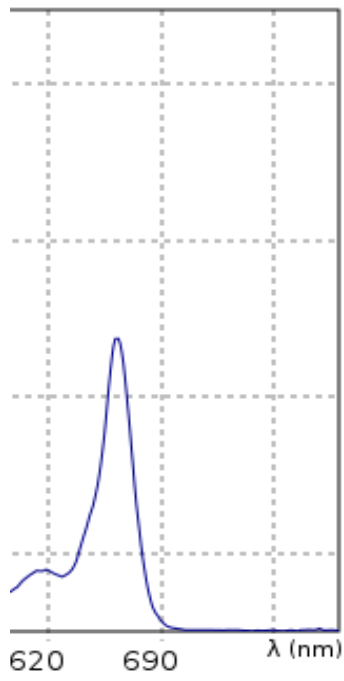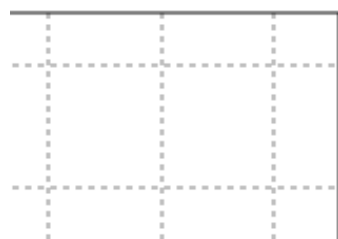



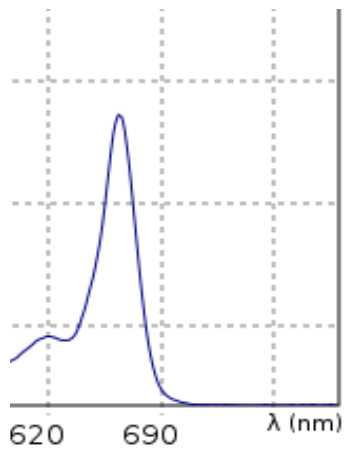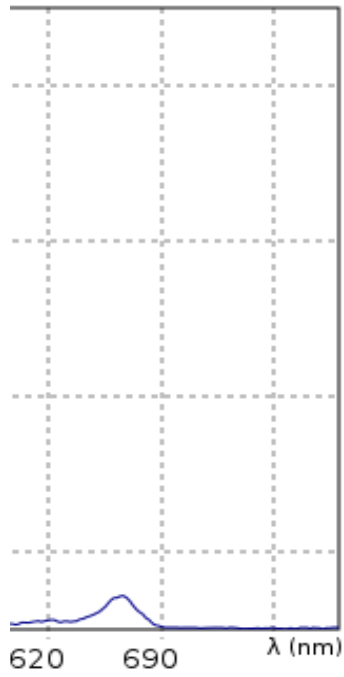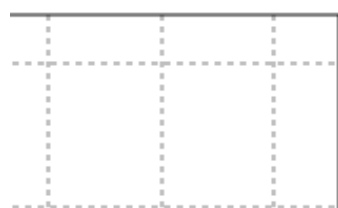

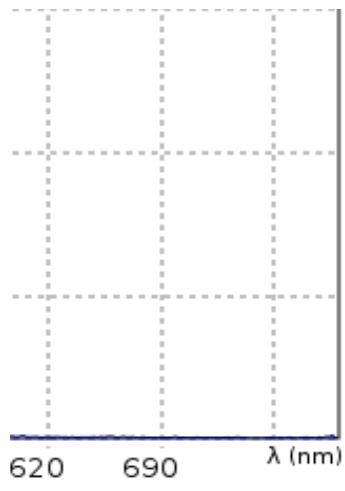

1000 nm; Phytofluene  
65 nm
